# Supplementary material for: Two novel viruses associated with the Apis mellifera pathogenic mite Varroa destructor
Source: PubMed Central journal article supplement (PMC5121581; doi:10.1038/srep37710), 2016-11-24

## Supplementary information

### Two novel viruses associated with the *Apis mellifera* pathogen mite *Varroa destructor*

Sofia Levin<sup>1</sup>, Noa Sela<sup>2</sup> and Nor Chejanovsky<sup>1</sup>

<sup>1</sup>Entomology Department and <sup>2</sup>Department of Plant Pathology and Weed Research, Institute of Plant Protection, Agricultural Research Organization, Israel

**Table S1- Primers used for amplification, sequencing and 3'RACE of VDV-2 from the *Varroa destructor* library**

| Primer name | Sequence                                          | Application        |
|-------------|---------------------------------------------------|--------------------|
| 1605F       | TTTGCTCACTTTAACAATCACAAGT                         | amplicon a- 4274bp |
| 5879R       | TTCTCTCCAGCTTTAGGTGCT                             | amplicon-a- 4274bp |
| 5822F       | AGAAATTTAGGGACCTCTCCGA                            | amplicon d- 3218bp |
| 9040R       | TGCGTCCTAAGCCAATTACG                              | amplicon d- 3218bp |
| 8775F       | <u>GATTACGCCAAGCTTCGAATCGCGTGGA</u><br>TGGCCATTAT | 3` prime RACE      |
| 2237F       | TGGGTATGACCGTGCTAGTG                              | sequencing         |
| 2926F       | GTGGGTGGCGGTATAATGGTA                             | sequencing         |
| 3777F       | GCAACATCCCGTAACAATGG                              | sequencing         |
| 5544F       | GGAATTGCGTCGAATTGTCAC                             | sequencing         |
| 5879R       | TTCTCTCCAGCTTTAGGTGCT                             | sequencing         |
| 6555F       | TGTGGCGTTTACTTGGGTGA                              | sequencing         |
| 4416R       | CAAGCACACTATCAACCACCG                             | sequencing         |
| 5213R       | CGGAGGAGCTACATGCATACC                             | sequencing         |
| 8385R       | TGGTGTATTGTCGCTGCTGA                              | sequencing         |

Primers sequences presented from 5' to 3'. The numbers correspond to the nucleotide number in the viral genome. F, forward; R, reverse. Two pairs of primers were used to amplify two large PCR fragments from the *V. destructor* library resulting in overlapping amplicons a and d. Underlined sequences added for 3' RACE (according to manufacturer Instructions). 5`prime is based on a contig of 3879 nucleotide length obtained from the *Varroa destructor* virome analysis the contig's sequence 3`end overlaps the 5`prime end of amplicon a.

**Table S2- Primers used for amplification and sequencing of VDV-3 from the *Varroa destructor* library**

| Primer name | Sequence                                             | Application  |
|-------------|------------------------------------------------------|--------------|
| 94F         | ATAGGAATGGCGGTCGTAGC                                 | amplicon     |
| 4145R       | CACGACGGACATACCACTTG                                 | amplicon     |
| 727F        | ACAGCCGCTCGTATCAAGAC                                 | sequencing   |
| 1602F       | GCCTTGGTCGAAGACTTGAA                                 | sequencing   |
| 3369R       | TTAGCCAACCAACGAAAACC                                 | sequencing   |
| 4091F       | <u>GATTACGCCAAGCTTCCTGGGAG</u><br>TGGAACCTTGCCACTAGG | 3`prime RACE |

Primers sequences presented from 5' to 3'. The numbers correspond to the nucleotide number in the viral genome. F, forward; R, reverse. Underlined sequences added for 3' RACE (according to manufacturer Instructions).

**Table S3- Accession numbers of viral sequences used for Iflaviruses' phylogenetic analysis**

| Iflavirus                                   | Accession number |
|---------------------------------------------|------------------|
| Acute bee paralysis virus                   | NP_066241.1      |
| Antheraea pernyi iflavirus                  | AHI87751.1       |
| Bombyx mori iflavirus                       | BAS18834.1       |
| Brevicoryne brassicae picorna-like virus    | ABP57198.1       |
| Deformed wing virus                         | AMK01489.1       |
| Dinocampus coccinellae paralysis virus      | AIM39350.1       |
| Ectropis obliqua picorna-like virus         | AAQ64627.1       |
| Formica exsecta virus 2                     | AHB62422.1       |
| Graminella nigrifrons virus 1               | AJT58559.1       |
| Halyomorpha halys virus                     | AGY34702.1       |
| Heliconius erato iflavirus                  | AHW98099.1       |
| Infectious flacherie virus                  | ADP24157.1       |
| Infectious flacherie virus                  | BAA25371.1       |
| Kakugo virus                                | BAD06930.1       |
| Laodelphax striatellus picorna-like virus 2 | AIX94679.1       |
| Lymantria dispar iflavirus 1                | AIF75200.1       |
| Nilaparvata lugens honeydew virus 1         | BAN19725.1       |
| Opsiphanes invirae iflavirus 1              | AKN81079.1       |
| Perina nuda virus polyprotein               | AAL06289.1       |
| Sacbrood virus                              | AND80528.1       |
| Slow bee paralysis virus                    | ADI46683.1       |
| Spodoptera exigua iflavirus 1               | AET36829.1       |
| Spodoptera exigua iflavirus 2               | AFQ98017.1       |

|                                     |            |
|-------------------------------------|------------|
| Spodoptera exigua iflavirus 2       | AHX00961.1 |
| Thaumetopoea pityocampa iflavirus 1 | AJC98140.1 |
| Varroa destructor virus-1           | AGO86045.1 |

**Table S4- Complete VDV-2 sequence- 9576 nucleotides**

AGCGGCTACAAAGTAGACCGCTCCGTCCAGTTTTATACGAAGCCGAGGCCCGGCAC  
AACTGCGAAGGGGAGGTCCCCCATATTGCGAAGTGGTAGCCCCACAAATTTTAATA  
GTAATTTGTTTTAAATATATTAACCTTTAAGTAAGGATTTAATTTAATATTCAAATAG  
ATATACCCTTTAGGCCTTTTGGCTGAAGGGTTACAAAGGCCAAGTGCCTTAAGGTGA  
GCCCATAGGGCAGTTAAATTTTATTTTATTTGCTATATACACATATTTTAGTTTTGAT  
AGTCCCTTAAGGACTATTTAGATAGATTATATATTATATATAAAATTAGTTAGTATTTT  
GTTACATATTATATATTTTATATTTTATATTATATATATATATAAAATATTAATTATGAT  
TATTTATAGTAAATTACGTAGTGCCCCGGACACATGGCAAAAAGTCCGGGGTTTTAA  
TCCCCGTAGGCAGTGGGAAAACCTGCCGACAGAATAGATTGGACCGCATAGCGGGCGG  
TTCAGCTTAACGTAACCTGCAGTAGACCGGCAGTTACGAAAATTGGAGGGCATTTC  
AATGCCACCTGATTTTCAGCCCAAAGGGCAATTCCCGTGCTAGGGAGGAAAGGGC  
AAAAGCCCTTAAACAAATAGATGTTCTCAGGGAGGACAAGGTGCGCCATCAGGCCA  
CCATTACAGAACTCTCGAAAGAGACTCGTCGAGAGTTCAAATGCGCAAGATTTAT  
ATGCATCGCTTTCGCGAGGAGCGCCGTGAGGTGAAGGCGCGAAAGGTTGCTAAGAG  
CAACCAATTTGCGGTCTTAAAGAAGAAAAGGACCCTTATTCATCCAGGTGGGTTA  
CACCTGATGAATATGTCGCTGAGCAGCGACTTTTTAAGCGCATTGAAAGATCTAATG  
CGTTTTATTTAAGCGCAAAGCGCTTAAAGGAGGAGGCCAAACAACAGCGCCTCGAG  
AGGCTCCTCAATGAGGAACCTCAATATCATCCACAGGTGAAACCTGTGGATCGCTCT  
GGCAGGCTACCGCTGGAGCAAATATTGCTCAACTTAGGTTGGGTTTGGGACAGGAG  
GTCCCATATTATCAGCCGTGATTTTCAATTGCGGCCTTATGGAGCCCAGATGGGCTC  
AAAGTATCAATGGGCATATTATCAGCCCATATATTATACAGCCTATAACACTAAGGC  
TGTTTTTGTTCGCCAGATGGAACAAGTTGAGGTCCCAAAGATATCTGGACCATCAAA  
AAAAGTGCGACTTTTTAGATCCAGTCGTGTTACAAATAAGCCCGCTACGATGGTTCC  
TTTGTCTCCACAAATGGATAATCAGGGCGCTCACGGTGAACAGCAATCGGAACAGG  
TGCAGAGGAATTCCGATACTTTGGTGGTTTCGGCCACCCTTCTTCTGTTGGGCATC  
ATCCACCAATATCAGGTTCAACGGAAGATTTTTGTGGTGTATATAAGACCAATCACCG  
ATGATACGCTCGCTAGTCGAGCTTTTGTATATCGTATGGGAGAATGGACAACATCTC  
AACCAACTAACACTTTGTTGTTCCGTAGCAAACCTCCCATGTGATGTTATTGTGGGCT  
TTAATGATCAACCTAATTTTGTCTACTTTAACAATCACAAGTATTGGCGTGGGGATA  
TTGAAGTTGAACTCCATGTACATCTAATGCCAGGATGATAGGAAGTTTGCAAACGT  
CCTGGTATTATGGATTGGAATGGGACGCCCATCGAGCCCTAAAGGATAATGTATAT  
ACTAATTCTCAAACAATGCATTGCCTAGTTGATGCGATGAACAGCAATGTAGGTGTC  
TTGAGAATACCATTTAGGTGTCCTAAGTCCTTTTTGGACTTGCAGCGTGTACATATA  
GGTGGTAATAACAACCATAACCGGGTTTGTATTTAGGCACCCTTGATGTACGTGTGCTC  
AATCAGTTGGCTGTGGCAAATTCTAATACAGCTAACGTGGCTAATTGGACCATGTCC  
ATCAAGTTTGTAAATAATAGGTTTATGGGTCCCGTGCATAGGAAATTACTCATACCA  
CAAATGATGGGGGCTTGGATGGCTTATCAAATGTTTAAAGAATTACGTGGTGATGCT  
AATAGAGACCAGCCTATTAACCCATCCACGCCCTCTCATATTAACCTGTGCCTACA  
GACGATTGGGCCTCAGGTAATGGGCAATCTTCAACAACCTTTCCATTGCGTTTAAAT  
CCCAGTGGTCTGCTTGTGTATAATGGGTATGACCGTGCTAGTGATATTGATGAAATG  
AAGGTTGATTTTGTAAAGAGTGTATTTGGCCTTCTTCATGTTGCTAAAAGGTCGGCA  
CAGGACACTGTACAAACGTGTATATATAGTATGCCTGTTGACCCAATTCTCCCGCCC  
GATATGTATTATAATCATGATTATTTAGGTGAGAATGTATATGCCTTACCACCTGTG  
GGTGTTTTGGCTAGTATGTTCTCATTATGGAGGGGAGAGTTGGAGGTGCGTTTAGAT  
GTTATAGCTGCGACCGATGTACGTGGGCGTTTAAATGCTTGCTTATGTGCCTAGTGAG  
AATGAGGTTGAGTATGCAGTGGCCATGGGTTTCATCAACTGTATATTATGATATAGAT

GAGAATAGGTCTTTTACATGGACCATTCCGTATATGTTCGGATCGCCCATGGCGTATG  
AGACGATATCAGCCTGATAGTCCCGGGTTCGTAAAAGACCATGGGAAATTTTATAT  
ATTTATAACTAATCGGCTTATTATAAATAACAGTCCCTGATTTTGCTTATATAAAT  
ATATATATTAGAGGAGCCCTAGTTTTGAAGTTGCAGTACCGTGTGAGCCTTTGATT  
GGTTTGGCATGGGAACCAAAGATCAGAACTGGTACCCATCAGCTAGAAATTGGATT  
TTTGTCTGGTTATTGGCCAGTATACGTTGGTGGGTGGCGGTATAATGGTAGTAGGGT  
AGTGATGCGATATGGCGAGACAACCGATCATATTGCACAATTGGACTATGGGGTTA  
TGTCTAAATTCCTTACTGCCAAGGTTAAACGAAATGTACCTGGTTATTTAAGATTA  
AAAGTTTAGATCCATCAGTTCAAACACCTGGTACTAATTATGCGGCCTTTAGGGGGT  
TACAGGGCGATTATTTGGCTAAGGGCTTGTCCCTGTAATAACAAAATCAGGGTATT  
GTTACACTATACCTGTGGTCACCGATTCTGATGCGGTTAATTATTACCGTCATCTGA  
AGGAAACCTCTGGGATTTTCCACCCAGCAGGTACAATATGTTTTGTTGAAAATT  
CAGAATATTGGTGTGCCAAAGGTAATCAAAATTTGGTATTGGAATGGACAGATGTC  
GTCTCGCGTGCCGAAATGGATGAGCGTATGAATGTTATAAATGGTGTAAATGAAAA  
CTATACAGCTGTTAGGCGCACAGGACATGGTCTTCAATTATTTGGTGAGTCGTTTGG  
AGACCTTAAGGATGTTTTAAGGCGGACAACACTATGTATATGGCTTGTTCGCAAGATTT  
TAGTTCAAGATCAAACCTTGTGGATATTAATTACCGGTTATTCCGCAAGGTCTTGT  
GTTTGATCAAGGGTCTGACGAGAATCCCAATTATTCCTGGAATTGGATTAGGCAGG  
GCAATAATCAAATTATTAATAGcGGTTATAGATTCTTTACGGGCaGAATGCATTTTAA  
GATTAGGGTGTTTTCAGAAAAAGATAGAGTTGCATTTTTTCGCCCAACACCGTCCCA  
TTTAAATTACATAGTgGATAGGCCAACAGCAACATCCCGTAACAATGGTGATAGTTA  
TGTTACATTGGAAGAGATGTGGCAACACGGGTATGCCACTATGGTCCAAGATTCGG  
CTAATAATAGATTCCTTGAAATTGAGGTACCTTTTTATCAGATGGGCACTTGTGGAA  
TAGGTCAAAGGATAGATATGGAGTCTATAGAGTCATATGATCCAGACCTTATCCATT  
ATTGTTCAATTGGGTGAGTTGGTGCTAGGTTCTTTAGGCGGTAATTCCGGCTGCCCC  
GTACTTATCAAGTATGGAGTCATGTCTCTGATGACTTCAGGCTTCTACGTTCCAGG  
GATTCCCGCAGATGATTTTTTTGTCTTATCAGGATCCTGTTGCTGTCCCGACGAAAT  
TAAATTATTTAAATCCCCAAAAATTTATTATAAAAAAGTAAAGGGGCAGCGTTCTCA  
AAAACCCAGTGCGCCTGATTGTGTAGAGTTGAGTGAGTTTAAACCCAGATGGAGG  
TACCAGAAATGTATGTGCCTGTAGTTAGTGACATATTCATAGTGTTAGAAATGTGT  
CCAAAACAAGTGCTACAGTGCGTAATGTTGTGAATAAGATTGATAATATACTTCCA  
ACTGGGGAGAGTAGTTTGGCATCGGTGGTTGATAGTGTGCTTGGTAAGTTTAAAGAT  
AGTGTTGATTATAATTCTGTACGTATGACATTATCGAATATTATGTCTAATATAGTG  
CATTGTCTTATTAACCCGGACCCAAAGACAATCGCTTGGGCCCTTATGTCTATAATA  
TATAATATATTCCATATTAAGGGTGTATTGTTTCTAGGGTATTGATATTGTGAGGG  
GTCTTATTGCTCATCTTGTGAATGTGAGGGAATGTATGAAACCGCAAATGGATGGTG  
TGTATGCTGACGTATATGAACCTCTGCAAGGTGCCGATGAGGGATTTGTAAGGAAA  
AATATAACAGCACTTTTATCGCTTATTATGGGCGCTGTGTTTACTTATTTAGGGTCTA  
GAAAACCTGTTAATTATAATGATTCGTTTGGCTTCTAGACTCTATGAGATTTTAAATTGG  
TTTTAGCAGAAATACAACCCAGCTGGTTAGATTCTTCCAAAACACGATAGAATTATT  
TATAGAAATTTTTGACTGGTGTGTAGGAAAAATTTGTCCCAAGTGGGATGCTGTTAG  
ATTTTTGGCCTCTAATGATCGTGATCTTTATAAGTGGGCCAAGAGCGTACAATATCT  
TACTGACGGGCGTAATCGGAATTTAGTTCTTACAAATCCTAAATTGGTAGCAGAATT  
GTATGCTAGTGCGAATGAGGCCTGTTTCATAAGACAGAGGATGTTGGCATTGGATA  
AATCTCTTAGTAACGCACAGACCATTACTATAAATAAATTAATTAATGACATCCTTA  
CTTTTAGGGATCAGGCGTCAGGTATGCATGTAGCTCCTCCGGTTAAGTTTGAGCCAT  
TTGTTTTACAATTAGGTGGTCCTCCTAACATTGGTAAGTCTCATTGTTGCAGGAGCT  
CACTGTTGATTTATTAGAACATGTGGGTTATTCAACATGGGGTGAACCAATTTATAT  
TAGGTCTCCTGGTAATGACTATTGGAATGGATTGACCAATCAGCCGATTGTTATTTA  
TGATGATTTCTGGCTGTTACGGCTGATCCAGTTGGGACACAACAAATTTCTGAGTT  
GTTCCAACCTAAGACAAGATGTGTCTTCAACCCTCCTATGGCTGCGGTGCAAGATAA  
AACTATTAGGTATAATCCAATAGTCGTTGGAATTGCGTCAATTGTCACCTTCTGGAA  
TTTGTGTGGTGTAGTAACCCTGAGGCGGTTTATAGGCGTAGAGACGTATTGATAGA  
TGTCGCTCTCAAGGGCTACAAGCAGATTTAGAGGGTGCCTCCGGAGGTGCTAAAGG  
AATATGGTCATTTAAAATTTAGGTTTTATTATAATCCTGCTCAGTCTTTAAGCCCGAC  
AACAGAATGGCAGGATTATGCTGATTTTTAAATTAGAATTGTGTAGAAGGTTTTAAAA

ATTATTATGAAAAAGAATCAAAGAAATTTAGGGACCTCTCCGAAAAATTATATAGA  
TTAGCACCTAAAGCTGGAGAGGAAGAGTTTAAATTTGCAAATCATGAGGTTGGTGA  
GGCATTAGATAAATTTCTTTGAGCGTCATAATGTCCTTGCCTCCCATGATGATATAGT  
TATTTCTGAGGTTATGAATATGATTAGCGAAAGAGCACGTAATAGGCGGCCTCAGA  
TTTATTCTAAAATGGGTGAACTCCTCAAAAAAGGAGAAAATTCTAGAAAAATGACC  
GTATCTCAAGCGCTTCTGGAGGCTTATTGTTTAACTAATTCCCCCCATTAAATCCTG  
ATTGTGTCAGAGATAAAATTTACAAAAATTTACGGGATAGATCTCTGATACCCACCA  
CTGAAAAGATTAAATTTGGCTATGGTTAAGGCTAAATTAGAGGCTCAAATGGAAACA  
GAGGAGCCAAGTATGAGTGAGTATATGAGCGTACATGAATACATGTGTCAGGAATG  
GTTGATGGCAAGTATGCTTCACTGGGAGAGTGAGAGAAAAGAATGGGTGATTTCGTC  
TCCATGCAGAATTAGCTGGAGATGATGAACGATTGGAGGCTGTGGCTAAATGGCAG  
AAGAAACATAAGATTGTCTATGAAATTGAAAATGCCACCATAAAAAATAGACAATAA  
TCCATGTGGAAATGGTGTGTTGCCCTTGGAGTGAGTCTAATATTAAGCCAAGTTCCT  
TGCTGATTTTATTAGCTGGGATGTGGCGTTTACTTGGGTGAGTCCAGAGGTGTGGA  
CATCATTGAGGCAGGTCTTGTGCCGGAAGACACAGCCGTTGAATGCGTGCCCGCTT  
GGAAGAAATGACTGATGAGACATGGTTGATAAAGGTGCGTAATTTAATATGGAAGG  
CACCGTGGAAATGGTTTATACGGTATTAACAGGTGTCATAGCAGCATTGGGTCTTA  
TTGCAGGGGTTGCTTCATTGTGGCATATGTTTAAAGGCCACCCCTCAGGAAAATATTG  
AGGGTGTTAAATTAGCACCCGAATCCCCTTATTCTTATGATCCTCGACGTGGTCACA  
AGTCTAAGGTGACCATGAAGATGGGTGCTAAGTATAATGTTATGCCTAAGTCTGGT  
AAATTTAGAGGGCAGGCATTGTTGACCCACACAATTGGAGAATCGTGTAACCTCCAT  
AATAAAAAGGAATACTTTCTTTATTAGGGCAACATATGAACTTAAATGGCGTAAGAT  
CTGTGCCAATTAATGCTCGATGCCTTGGGGTTACAGGCCGATATGCCATATTCCCAT  
TGCATTATAACGATGCATGGGAACGTCTCAATGAACTTGATGGCGTTAAATTTGAGT  
ATTATGATGTGACAACACCTATACCCATTGAGTTCGCGTATGATGAAATTGACATAT  
TGGCGTCAGATGATTCAGCAGCCCTGGCGTTTATTTCGTATGCCAAAACGTTTTAGGG  
TGTTTAGGGATATTAGAAATCATTTTATCCCTAATGATAAAAATTTGTGTGGGGAAGA  
CAAAGGCATGTCTTTTTGAGTTGAAAATTGATTTAAATAAAAAATTTAACTACGATAG  
ATAGGCATAACTTTGAAGCTGAACGCTCTGAGAGCTGTAAAATCCCAGCCTCAGAG  
CATTTTAAATGAATTTACTGTCTCGTCGGCCTATAGGTATGCGTATGGCGGTGCGGGT  
GTATGTGGTAGTGTGCTGTTTACTGGATGGGCAATATAATTGGTATGCATGTGGCT  
GGTTTGGGTGATGGATCAGTGGGTATGAGTGAATGGTTAACTGAGACCGATATGAA  
TGATCTTACTAATCTTATGTCCGAGTTAGAGGATCCTGTGGGTGAAGTAGAGTTTAA  
TCCAGAAATTTTACCAGAAAAACCTGATGAACTTGTGATGAATCCGACATGCCAGG  
TTCTGGATATTGGTATGATTCACCCATCTTTCAGAAATTTTGTGGATAAAGATTTCA  
AGTTAATTAGGAGTCCGGTTCATAAATTGGCTGAAATAGAACACTTTCCAGATCTAG  
TAGAACCTGCTATACTGGATCAGCGTGATAATAGGTATCAATATAGTTTCGTCACCTC  
TATTTGCGGGCCTTAAGCATCATGGGTGTCCAATGAGACCGTTACCGTTGGAGATGA  
TCGAAGAGGCTGTCGGACACTACACGCACAAAGTACTTACTTTGTGTAGACCTGTGC  
GCCAGAACC GGCTATCCTTTCGGTGGAGGAGGCTTGTATGGGCGTGGAGGGAGTT  
AGACTGATAGCCCCTCTTGATTGGGGATCTTCTGCGGGATGGCCTTGGAGGATATCT  
CGTGATGTTATTAATCCGGCAACAAAATCTTCGTGGGTAAAATTGACTAACGAAAA  
TACTAAATTTATTGGCCTTCATCCAGATTTGGAGGAGGTGATGAACATTAACATGA  
ACAACGCGTGGCTGGAATCGTTCCACTGACGGTGTGTTGCTGACATATTGAAGGACG  
AATTGGTGCCTCATGCAAAGCAATGCGTGAGGGCGCGACGAGGATTGTCTCGATG  
AGCCCCATCGACTTCACTATTACAGCAGCGACAATACACCATGGATTTGCTCGCGTCA  
TTCATGGAGAATAGATTGGATCTGGAACATGCGATAGGTATCAATCCGGACTCAAG  
GGAATGGACAGACCTCTATGTTAAATTAGCAAAGGAGGTAAGACCAAATTCATAG  
CAGGGGATTATTCTAAATTTGGGGATAAACTTCCGACCGAGATTGGCGTGC GGATG  
TTTGGTGTGATTGGTGC GTGGTATGCCCGGTATGCACCCCGGAGCAAGTATGTATT  
ATACAGAGGGTGCTTTCTATTATGGCCTTAGAGGTCTTCAATGCAAACACATTGCG  
GACCGTTGGGTTTATCAGTGTGTGAATGGATTGCCAAGTGGTAACACCATGACCGTA  
GTTTTAAATTC AATGGTCAATTCATTTTTATTTCGAATCGCGTGGATGGCCATTATGT  
CCAACACAGAATTTAGTGGTTTGGATAATTTGAAAAGTATACTAGTCTATATTCGT  
ATGGTGATGATGTTATCATTGGCTTGGATGATTGTGTATGCGACTTGTTCAATACGC  
TAACAATTAGGGATTTCTTTGCCAGGTACGATTTAAAATTTACTGATGCAGATAAGG

AAGGTATTCCAGTTAAATATAGGACATTAGATGATATGACCTTCCTTAAACGTAATT  
GGCTTAGGACGCACGATAGGAAATTAATTAGTTCAAGAGTATATTTTCTTGCTCCCT  
TGGCCGAAGATTCAATGTTTGGCATTCTACATTGGATTAAGAAGGGGCATGAACCA  
ATAGAGTTTGCCAAGGAAATGTCTGAAGAGAGTGCTCGCATGGCTTTCACCCATGG  
CGAGGAATATTATAATAAACATTGTGATAAAATTAGACGTATTTGGCAAAAAATGG  
GGCATTATATTTGTTTGCCCAATTGGCATGATTTAGCGTATAGAACATATTTGAGTG  
ATCAACCGTTGCTGCGCTTGACGCGTAAGCTTGAAGGCTTGCCTGAAGCTTATGGCG  
GACCTGCGGGCCACGCAGGTTAGCGCGGCAGGAGACCATCCTAGTTTTGAATCGAT  
AGGTGTACTAGGGTGGGCCCGGGCTGGTGAAGCCCCTTATGGAGGGATTTTTATCCT  
CTTTTGCATGTAGGGGTTTTTCCCCTCCATAAGGTTCCGGGTGTGGCAAACACCTAC  
AAAAAAAAAAAAAAAAAAAAAAAAAAAAAAAAAAAAAAAAAAAAAAAAAAAAAAAAAAAA

**Table S5- Complete VDV-3 sequence- 4202 nucleotides**

CTGTGTCAGAGCGAATCTGAGTGATTTGTTTTGATTTCCATAGTGATAGTTGATCTTA  
AGCAAATATGGATTTTGCAAATAGAAAAGCTACTTATAGGAATGGCGGTCGTAGCA  
TGCCCGTTCCCCCGTAAATTGTGCGTGGGGTAAGTGGAGCACGCTGCTTACCGTCG  
TGCTTGTGCGGCTACTGTAATTTATATGAATTGTATAGAGTTACAATATACGTTTCG  
ATTTACGAGAGATGAGGTTTGACCACATAATATGTACTTTGATCTGGACAATGGCTC  
TAATATTTCTAGTGGTTAATGGAGTACTTGGGCTCGAATACCGGATTAAGAATATTA  
TGTATAATATGTTTCTGCTGGATGCCCTAAGACTACGATTTATGAAGATACAGCTA  
TGTTGGAGAGTATGAAGGTTAATCCTTTGGTTACAGCTCATCCTGATACTTTCCCAA  
GTTGTCAGTTAATGGTGTCTTACGTGCAATGATCAGGGTGTATGGTGTAGGGCGGGTA  
ATGGCTTTAGAATTTCTAAGACCATAGTTGTCCCAACACATGTTATTGATACATCCG  
CTTTTACTGCAAAGTATGTGCGCTTGGCTGTACCTGAGGGGAAAAGATTAGGAAAG  
ATGGTAGTAGTTGAGACGCCATAAAGGACATATTGACCATTGGGGATGATATATC  
CCTTATCAACATCTCAGAGATTGAATTGAATCGTTTAGGTGTGACAGCCGCTCGTAT  
CAAGACTTTGGATACTAAGCAGACATCAGTTATGGCAATGATTTACTCCTATGCTCC  
TTTGTTTAAGGCTAGCGTGGGTAAAATTAGTCCATTTGATGGTTTGGCGCAACAAAT  
TGTATTTTCTGGATCGACGATTCAAGGATTCAGTGGAGCGCTTACGTTGCGGGTAA  
GAATGATGTGTATGGGATGCACACGTCAGGCGGTGCTGTGAATTTTGGCATATCGG  
CTAGTTATTTGCAGCTGTTGGTACTCGGTACTGAGTCGAATGACACTATCATCAAGA  
GTCAGGATAACCCCTTAGTAGGTTGATAAAAAGATTCATGGAATTGGAAAATGGG  
TCGAGTGTGACGCCAGAATCGAGGGGTGGTTATTCATCTGACAGGACGCTTGAGGA  
ATTCCTTTTCGATTGGGATAACAAGAAGAAAGGAAAAAATTGGGCGCAATTGGAATG  
ACTCATTGGGTGCTTATGTGTATTCAATTGAAGGTAGATTCTATAATATTACTGAAG  
ATATCGACAATTATGCACAGATTCGGTTTCCACATCTTTTTGAAGATGCCGATTTTG  
AGTATGACACCCATGATGAGAATGGTGATAAGCGAGTTAGGCATAATAAGTTTTCG  
AAATCAAAACGATATGCAAACCAATTGAAGATGAAATTCCAGTTGAAGATATTTA  
TGAAGAAGAAGAAGAATATCGCCTGGAAGAACGTAGAAGGAAGAAGGTTGAGTTT  
GATGAATTCGTTAGAAAACATGAATTGGCCGGTAGTGCTTGGTGGGCTGATGAATC  
AGCTACTAAGCGAGTAAAACAATCAGAGAACGTTGGTATTGGTGTCTGTTTAGCTC  
TTTGACGAAGCTCACAGCCTTGGTTCGAAGACTTGAAACAAAAATGTTTGGCTGCTG  
AAGTTAAGAGCGATCAATGTCATAAGGAACACCAGCAGTTGATGAAGCGGCTCTTA  
ATACAAGAGGCGAATGCCAATCCAAATGGTGGATATAAGGATGATGTGTTAATGGA  
GCCAATTTTCCACGGGGATTCTGAAGCTGAATTGTTGGCTGACTATAACCAAATGGT  
CGCACCCATGTTGGTTGAGGATGAGTTGGATTTGTTGCGGGAAACCGTTAATAAATC  
CGAAGTCAGCTACGAGGAAGTGCAGAGTATTAGATCAATCTGTAATAGACTGACTC  
AACTGGGAAAGTTTTTCAAATCAATTGTTGAGTACTATTGACAAGATTCGCGCTGATA  
AGAAGAAACGGGAAGCTGAAGAAAGAGCTCGCCAGATTGAGATGGAATTGAAGAT

GAGGAAAAAGAAGAACTCAAGAAGCGTGCTATTGAAATGGAAGAATCCCGGGCC  
AGACAGGAGTCTGAGGCAAAGGAGAAGGAAGTGAAGCGAAGCGCAATGTGTTTAC  
GTGTGCGCGAATTGTTTCGAGAGTTTAAACGGAAGAGGAAATTAAGAATTCTCTAGG  
CTGGTGGTCGAGAGAAATACCAAGAGGGCTCTAGCTCGTAAATCCGAAAAGGAGA  
AGATGAGACAAGAAGTCATCTCGGCTATCGACCGACCAGAGGAGAAGTCCGACAA  
GAAGATTGTTTTAGAAAGGTAAGTTAAAGGACACTAAATCTTCTGTAAAGGAAG  
ATATTAGACCGCCTCCCAAAGGAATGATAAGATGTCCATCTTGCATTATAAGGAAG  
GCAAAGGATAGGCCTTGCTTTAGCAACAACCAGATTTCTTTAAACACATGGAGGA  
GGTTCATCTTACACGTTTGGAGGCAGCTCCTTCGGGAAACTAGGTGAGCCCGCCGGT  
GGGCGGGCTTGTCTGACGATTGTGACTGCCTCCAGATGTTTGGTATGTTTGAGAAT  
CCAAGTGTAAGGAATGATTGTTGTGGTAAAATGCATTGTATGAGAGATTTGTGGATT  
CCTTTGCGGAATACCCGTAAGCTGTAAAGAATAAATTGGCTGGTTCGTTCTATGAT  
GCTGAAACTCTTAGTAGAGTATTTTCGGCAGAGGGATTCGAACACCAATTTCAATAT  
CCAATGCCTAATAGCGTCGATGCTCCCCGTTATTTGGGAGCTTCACTGTGTTACCAC  
GCCCCGTTAGCTTTGAGATCTCGTTCATTGTTGAAACCTCCAACCAATAAGGAAATG  
GATTTGATATTGGACGATGTCGAGCGCGTTTATGGTGCACACGCGTTTTGTGGCAT  
GGTGTGAGGAGGTAGATGATGATTTAATGGCTGAATTTATGTTGAAGTTGGATAG  
GGACGCCAGTCCGGGTTATCCTTGAAAGATGAGGCGCCCACCAGTGAGGTTTTAT  
TTGGTCTTGATGCAGCCCATCTTCCACACAATTACACCAATGTCATGCGCGTTAAAG  
AATCTGTAATGCCAGATTACGTGTCTTGAGGAAGGGAGTGGTTGAAGCCGACAAC  
ATCAACGTCTTCATAAAACAAGAGCCACATAAGATGAAGAAGGTTGATGATGGAGC  
GTGGAGACTGATACAAGGAGTGGGTTTACTGATAATTTAGTTGATCGGCTTATTTT  
TACACACTGGTTTGGAGCGTTAATTGAGAAACACCGCAGTGTACCTAGTAAACCAG  
GTTGGGCACCCATCAAGGGAGGTTTTCGTTGGTTGGCTAATCAGTTTAGACGACCGA  
TGATGGCTGATAAGTCAGGATGGGATTGGACAGTACAAGAATGGCATGTGGACTTC  
CTGAAACGGTTCATAACCCGAATGATAGTTGGGGTCCCAGAAGTTTTGGTGAATTCG  
AGAATTGATGCCTTGCTTGAGGAGTGTAAATGGCAGTTAGCAGATACAGTCATAGT  
GCAGAATGCCATGGGTGTGCAGAAGAGTGGTTGTTTTGGCACCATTGCTTTCAACAG  
CCTATGGCAGTTTGCAGTCCATGCTCTGGTTTGTTCGGAGATTAGGCTGGTCTTTGGA  
GAGACTTGGGGGGTTTTGCCTGTTTGGGAGATGATACCCTTCAGGAATGTGTCCCTAA  
TGTACCGGCCTATGAGAGTGAAGTTGCAAAGACTGGTGCTATTGTCAAAACCTCGG  
AGATTTCTGATTTGGTTAATCCAATAAGTGAATTCGCCGGGTTTAAATTTGACAAGG  
AAACCTGTCTACCGGCATATGGTGCTAAACATGCTTACATTTTATATCATGTGAGTG  
AAAGTGAAGCACCAGAGACGCTTGCTAGCTATCTACTGAACTATGGCATGCATGAG  
GAAATTTAGGTTTCCTCAGGCGTGAGCTTATCAGGCTGGGTTATCCAGAATTTGCG  
TTGAGTAAAGACATGCTCAAGCATTTCTGGACTGGCTTGGAAATAGGCTCTGGGTGTT  
GCAGCACCTGGTACCCTCTTCCCTGGGAGTGGAACCTTGCCACTAGGATTGGTC  
ACCAAGTGGTATGTCCGTCGTGAATCGGATCCCGGGCCCGTGCAGTGCAGAGGCCT  
GCATGCAAGCTTTCCTATAGTA

**Table S6- Blastx analysis of *A. mellifera* contigs**

| <b>Contig ID</b> | <b>Description</b>                                                                                           | <b>Length</b> | <b>#Hits</b> | <b>e-Value</b> | <b>sim mean</b> |
|------------------|--------------------------------------------------------------------------------------------------------------|---------------|--------------|----------------|-----------------|
| c6358_g3_i1      | polyprotein [Varroa destructor virus-1]                                                                      | 7664          | 5            | 0.00E+00       | 97.40%          |
| c6350_g2_i3      | polyprotein [Deformed wing virus]                                                                            | 2069          | 5            | 0.00E+00       | 97%             |
| c6350_g2_i1      | polyprotein [Varroa destructor virus-1]                                                                      | 1997          | 5            | 0.00E+00       | 97%             |
| c6350_g2_i2      | polyprotein [Deformed wing virus]                                                                            | 1911          | 5            | 0.00E+00       | 97%             |
| c6355_g1_i1      | structural polyprotein [Black queen cell virus]                                                              | 3062          | 5            | 0.00E+00       | 96.80%          |
| c6355_g1_i2      | structural polyprotein [Black queen cell virus]                                                              | 1970          | 5            | 0.00E+00       | 96.60%          |
| c6355_g2_i2      | non-structural polyprotein [Black queen cell virus]                                                          | 1758          | 5            | 0.00E+00       | 96.40%          |
| c5497_g1_i1      | BCL2 adenovirus E1B 19 kDa -interacting 3-like                                                               | 581           | 5            | 1.70E-95       | 96%             |
| c8148_g1_i1      | tobamovirus multiplication 3-like isoform X1 xenotropic and polytropic murine leukemia virus receptor ids-4, | 395           | 5            | 1.20E-57       | 96%             |
| c9570_g1_i1      | non-structural polyprotein [Black queen cell virus]                                                          | 201           | 5            | 1.30E-33       | 95.20%          |
| c6355_g2_i1      | polyprotein [Sacbrood virus]                                                                                 | 4528          | 5            | 0.00E+00       | 94.40%          |
| c6359_g3_i1      | tobamovirus multiplication 3-like isoform X1 feline leukemia virus subgroup C receptor-related 2-like        | 7622          | 5            | 0.00E+00       | 93.80%          |
| c7894_g1_i1      | capsid protein [Lake Sinai virus 1]                                                                          | 245           | 5            | 4.00E-44       | 93%             |
| c457_g1_i1       | capsid protein [Lake Sinai virus 1]                                                                          | 362           | 5            | 1.10E-73       | 92.20%          |
| c722_g1_i1       | tobamovirus multiplication 3 xenotropic and polytropic murine leukemia virus receptor ids-4,                 | 2826          | 5            | 0.00E+00       | 89.60%          |
| c2876_g1_i1      | tobamovirus multiplication 2A                                                                                | 3040          | 5            | 0.00E+00       | 88.80%          |
| c7183_g1_i1      | coat protein [Grapevine Bulgarian latent virus]                                                              | 291           | 5            | 5.50E-40       | 86.20%          |
| c16552_g1_i1     | polyprotein segment 2 [Grapevine Bulgarian latent virus]                                                     | 242           | 5            | 1.50E-17       | 84.60%          |
| c8697_g1_i1      | L [Farmington virus]                                                                                         | 268           | 5            | 3.10E-15       | 80.80%          |
| c6357_g2_i1      | polyprotein [Deformed wing virus]                                                                            | 2483          | 5            | 0.00E+00       | 75%             |
| c6357_g1_i1      | polyprotein [Deformed wing virus]                                                                            | 2414          | 5            | 1.10E-150      | 66.20%          |
| c6346_g1_i1      | structural polyprotein [Black queen cell virus]                                                              | 14606         | 5            | 0.00E+00       | 45.80%          |

**Table S7- Blastx analysis of *V. destructor* contigs**

| <b>Contig ID</b> | <b>Description</b>                                                     | <b>Length</b> | <b>#Hits</b> | <b>e-Value</b> | <b>sim mean</b> |
|------------------|------------------------------------------------------------------------|---------------|--------------|----------------|-----------------|
| c11085_g1_i1     | polyprotein, partial [Deformed wing virus]                             | 409           | 5            | 2.80E-91       | 100%            |
| c10331_g1_i1     | capsid protein, partial [Deformed wing virus]                          | 277           | 5            | 1.10E-58       | 100%            |
| c11078_g1_i1     | polyprotein [Deformed wing virus]                                      | 252           | 5            | 6.50E-55       | 100%            |
| c10951_g1_i1     | polyprotein [Deformed wing virus]                                      | 322           | 5            | 3.50E-51       | 99.60%          |
| c24131_g1_i1     | structural polyprotein [Sacbrood virus]                                | 413           | 5            | 6.80E-92       | 99.40%          |
| c24947_g1_i1     | non-structural polyprotein [Black queen cell virus]                    | 355           | 5            | 1.20E-71       | 99.40%          |
| c5466_g1_i1      | polyprotein [Sacbrood virus]                                           | 781           | 5            | 8.70E-171      | 99.20%          |
| c11085_g2_i1     | polyprotein [Deformed wing virus]                                      | 1712          | 5            | 0.00E+00       | 99%             |
| c19779_g1_i1     | structural polyprotein, partial [Black queen cell virus]               | 208           | 5            | 1.70E-37       | 98.80%          |
| c4948_g1_i1      | polyprotein [Deformed wing virus]                                      | 211           | 5            | 9.80E-36       | 98.40%          |
| c18557_g1_i1     | PREDICTED: tobamovirus multiplication protein3-like [Nicotiana glauca] | 208           | 5            | 1.20E-38       | 98%             |



|              |                                                                                           |      |   |           |        |
|--------------|-------------------------------------------------------------------------------------------|------|---|-----------|--------|
| c11088_g2_i3 | structural polyprotein [Black queen cell virus]                                           | 835  | 5 | 0.00E+00  | 97.80% |
| c11057_g2_i1 | polyprotein, partial [Deformed wing virus]                                                | 284  | 5 | 1.10E-58  | 97.80% |
| c11093_g1_i1 | polyprotein [Varroa destructor virus-1]                                                   | 9164 | 5 | 0.00E+00  | 97.20% |
| c9198_g1_i1  | polyprotein [Sacbrood virus]                                                              | 821  | 5 | 1.10E-180 | 97%    |
| c14161_g1_i1 | polyprotein [Sacbrood virus]                                                              | 594  | 5 | 5.70E-112 | 97%    |
| c11088_g2_i2 | structural polyprotein [Black queen cell virus]                                           | 4932 | 5 | 0.00E+00  | 96.80% |
| c704_g1_i1   | non-structural polyprotein [Black queen cell virus]                                       | 578  | 5 | 9.50E-123 | 96.80% |
| c11088_g2_i1 | structural polyprotein [Black queen cell virus]                                           | 398  | 5 | 1.70E-82  | 96.60% |
| c11087_g2_i1 | polyprotein [Sacbrood virus]                                                              | 2431 | 5 | 0.00E+00  | 96.20% |
| c28455_g1_i1 | non-structural polyprotein [Black queen cell virus]                                       | 439  | 5 | 2.20E-86  | 96%    |
| c11087_g1_i1 | polyprotein [Sacbrood virus]                                                              | 608  | 5 | 3.90E-117 | 94%    |
| c11044_g1_i1 | polyprotein [Deformed wing virus]                                                         | 559  | 5 | 9.10E-111 | 94%    |
| c4210_g1_i1  | non-structural polyprotein [Black queen cell virus]                                       | 1072 | 5 | 0.00E+00  | 93.60% |
| c11057_g3_i1 | polyprotein, partial [Deformed wing virus]                                                | 223  | 5 | 1.90E-37  | 93.60% |
| c11074_g1_i1 | replicase polyprotein [Acute bee paralysis virus]                                         | 9590 | 5 | 0.00E+00  | 92.40% |
| c10756_g1_i1 | P15 [Varroa destructor Macula-like virus]                                                 | 252  | 5 | 9.60E-42  | 90.20% |
| c10756_g1_i2 | P15 [Varroa destructor Macula-like virus]                                                 | 220  | 5 | 6.00E-37  | 89%    |
| c10988_g1_i1 | polyprotein [Deformed wing virus]                                                         | 355  | 5 | 8.40E-60  | 88%    |
| c15340_g1_i1 | RNA-dependent RNA polymerase [Varroa destructor Macula-like virus]                        | 269  | 2 | 2.90E-50  | 88%    |
| c20855_g1_i1 | structural polyprotein, partial [Israeli acute paralysis virus]                           | 219  | 5 | 7.00E-30  | 83%    |
| c22187_g1_i1 | non-structural polyprotein [Black queen cell virus]                                       | 710  | 5 | 4.70E-110 | 81.20% |
| c10810_g1_i1 | polyprotein [Maize rayado fino virus]                                                     | 421  | 5 | 3.10E-58  | 79.80% |
| c30069_g1_i1 | RNA-dependent RNA polymerase [Varroa destructor Macula-like virus]                        | 271  | 5 | 2.70E-51  | 79.20% |
| c11057_g1_i1 | polyprotein, partial [Deformed wing virus]                                                | 224  | 5 | 2.90E-31  | 78.20% |
| c19782_g1_i1 | polymerase acidic subunit [Aransas Bay virus]                                             | 319  | 5 | 5.10E-29  | 78%    |
| c1503_g1_i1  | putative replication-associated protein 2 [Florida woods cockroach-associated cyclovirus] | 210  | 5 | 6.50E-20  | 77.80% |
| c23590_g1_i1 | polyprotein [Maize rayado fino virus]                                                     | 378  | 5 | 3.50E-49  | 77%    |
| c1508_g2_i1  | replication-associated protein [Anguilla anguilla circovirus]                             | 325  | 5 | 5.10E-33  | 77%    |
| c10878_g1_i1 | RNA-dependent RNA polymerase [Varroa destructor Macula-like virus]                        | 638  | 5 | 4.50E-106 | 74.80% |
| c4341_g1_i1  | PB1, partial [Jos virus]                                                                  | 305  | 5 | 6.30E-29  | 72%    |
| c16161_g1_i1 | replicase protein [Erysimum latent virus]                                                 | 221  | 5 | 1.40E-17  | 71.20% |
| c6211_g1_i1  | polymerase basic subunit 1 [Upolu virus]                                                  | 304  | 5 | 7.20E-27  | 71%    |
| c359_g1_i1   | PREDICTED: influenza virus NS1A-binding protein homolog A-like [Metaseiulus occidentalis] | 243  | 5 | 3.90E-25  | 70.20% |
| c4939_g1_i1  | RNA-dependent RNA polymerase [maize rayado fino virus]                                    | 411  | 5 | 7.00E-38  | 69.20% |

|              |                                                                                                      |      |   |          |        |
|--------------|------------------------------------------------------------------------------------------------------|------|---|----------|--------|
| c31128_g1_i1 | GP64 [Epiphyas postvittana nucleopolyhedrovirus]                                                     | 248  | 5 | 1.60E-20 | 68.20% |
| c8474_g1_i1  | RNA-dependent RNA polymerase [Turnip yellow mosaic virus]                                            | 770  | 5 | 2.90E-75 | 67%    |
| c48_g2_i1    | gp67 [Choristoneura fumiferana multiple nucleopolyhedrovirus]                                        | 250  | 5 | 1.30E-16 | 65.80% |
| c10913_g1_i1 | polyprotein [Brevicoryne brassicae picorna-like virus]                                               | 235  | 5 | 1.60E-14 | 65.20% |
| c8205_g1_i2  | non-structural protein [Spodoptera exigua iflavirus 1]                                               | 520  | 5 | 2.20E-17 | 63.80% |
| c20706_g1_i1 | PB2 polymerase subunit [Thogoto virus]                                                               | 216  | 5 | 2.10E-08 | 63.60% |
| c10905_g4_i1 | replication-associated protein [Dragonfly cyclovirus 6]                                              | 525  | 5 | 1.60E-49 | 63%    |
| c9968_g1_i1  | polyprotein [Plantago mottle virus]                                                                  | 245  | 5 | 6.30E-13 | 62.80% |
| c8514_g1_i1  | replication-association protein [Cyclovirus TN25]                                                    | 931  | 5 | 1.10E-46 | 61.20% |
| c1508_g1_i1  | replication-associated protein [Dragonfly cyclovirus 6]                                              | 542  | 5 | 1.90E-26 | 61.20% |
| c27530_g1_i1 | rep protein, partial [Circovirus-like NI/2007-3]                                                     | 224  | 5 | 3.00E-09 | 61.20% |
| c21581_g1_i1 | nucleoprotein [Thogoto virus]                                                                        | 401  | 5 | 7.70E-27 | 60.40% |
| c7702_g1_i1  | replication-association protein [Cyclovirus NG8]                                                     | 328  | 5 | 5.30E-15 | 60.40% |
| c8205_g1_i1  | non-structural protein [Spodoptera exigua iflavirus 1]                                               | 457  | 5 | 5.30E-09 | 59%    |
| c10905_g3_i2 | replication-associated protein [Dragonfly cyclovirus 6]                                              | 917  | 5 | 6.70E-37 | 58.40% |
| c8514_g2_i1  | replication-association protein [Cyclovirus TN25]                                                    | 740  | 5 | 2.70E-33 | 58%    |
| c11347_g1_i1 | polyprotein [Heliconius erato iflavirus]                                                             | 272  | 5 | 3.50E-11 | 57.80% |
| c27684_g1_i1 | polyprotein [Heliconius erato iflavirus]                                                             | 344  | 5 | 7.70E-18 | 57.40% |
| c11061_g1_i1 | polyprotein [Brevicoryne brassicae picorna-like virus]                                               | 782  | 5 | 3.90E-34 | 56.40% |
| c10876_g2_i1 | non-structural protein [Spodoptera exigua iflavirus 1]                                               | 796  | 5 | 3.90E-12 | 56.20% |
| c7507_g1_i1  | polyprotein [Formica exsecta virus 2]                                                                | 238  | 5 | 6.30E-08 | 56.20% |
| c11086_g2_i2 | polyprotein [Halyomorpha halys virus]                                                                | 437  | 1 | 8.80E-08 | 56%    |
| c11092_g1_i2 | putative polyprotein [Tomato blistering mosaic virus]                                                | 5058 | 5 | 0.00E+00 | 55.40% |
| c11083_g2_i1 | polyprotein [Sacbrood virus]                                                                         | 715  | 5 | 3.10E-25 | 55%    |
| c11553_g1_i1 | polyprotein [Antheraea pernyi iflavirus]                                                             | 422  | 5 | 1.10E-16 | 54%    |
| c16528_g1_i1 | glycoprotein [Jos virus]                                                                             | 315  | 5 | 7.40E-14 | 53.80% |
| c2745_g1_i1  | ENV_DHVI1RecName: Full=Envelope glycoprotein; Flags: Precursor [Dhori virus (strain Indian/1313/61)] | 1185 | 5 | 5.60E-64 | 53%    |
| c18230_g1_i1 | nucleoprotein [Aransas Bay virus]                                                                    | 380  | 5 | 1.10E-19 | 51.80% |
| c11092_g1_i1 | polyprotein [Plantago mottle virus]                                                                  | 6436 | 5 | 0.00E+00 | 51.20% |
| c11050_g1_i1 | polyprotein [Sacbrood virus]                                                                         | 433  | 5 | 1.50E-08 | 51%    |
| c11086_g2_i4 | polyprotein [Halyomorpha halys virus]                                                                | 442  | 5 | 3.80E-09 | 50.20% |
| c11083_g3_i3 | polyprotein [Slow bee paralysis virus]                                                               | 690  | 5 | 1.30E-13 | 49.80% |
| c11029_g1_i2 | polyprotein, partial [Bat feces associated picorna-like virus SC2797]                                | 374  | 3 | 2.70E-09 | 49.67% |

|              |                                                                       |      |   |          |        |
|--------------|-----------------------------------------------------------------------|------|---|----------|--------|
| c11089_g1_i1 | hypothetical protein, partial [Ixodes scapularis associated virus 2]  | 4169 | 5 | 6.20E-51 | 49%    |
| c11029_g1_i1 | polyprotein, partial [Bat feces associated picorna-like virus SC2797] | 417  | 5 | 5.70E-10 | 47.60% |
| c11009_g1_i1 | polyprotein [Formica exsecta virus 2]                                 | 478  | 3 | 8.30E-10 | 47.33% |
| c11083_g4_i1 | polyprotein [Slow bee paralysis virus]                                | 1269 | 5 | 2.70E-18 | 46.40% |
| c11094_g1_i1 | polyprotein [Brevicoryne brassicae picorna-like virus]                | 4574 | 5 | 2.70E-86 | 46%    |
| c7844_g1_i1  | polyprotein [Slow bee paralysis virus]                                | 714  | 2 | 1.60E-06 | 43.50% |
| c6947_g1_i1  | polyprotein [Slow bee paralysis virus]                                | 499  | 1 | 5.80E-06 | 43%    |
| c11080_g1_i1 | capsid protein [Mosinovirus]                                          | 1573 | 2 | 1.20E-31 | 41%    |

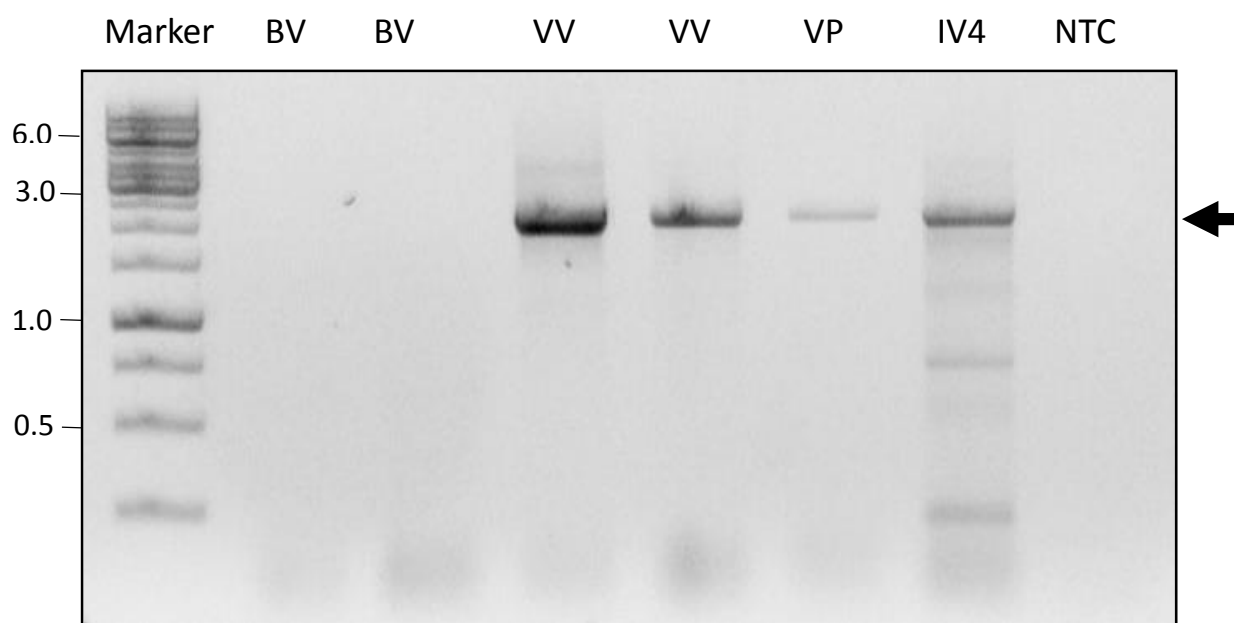

**Figure S1. VDV-2 is present in the *Varroa* virome but not in the honey bee virome.** RT-PCR run of the honey bee and *Varroa* viromes (BV and VV labels, respectively). VP, sample from a pool of 30 *Varroa* mites randomly collected. IV-4, *Varroa* transcriptome sample. NTC, primers only. VDV-2 primers used were 3777F and 5879R (see Supplementary Table S1). Arrows VDV-2. Marker: GeneRuler 1 kb DNA Ladder (Thermo Scientific Inc.).

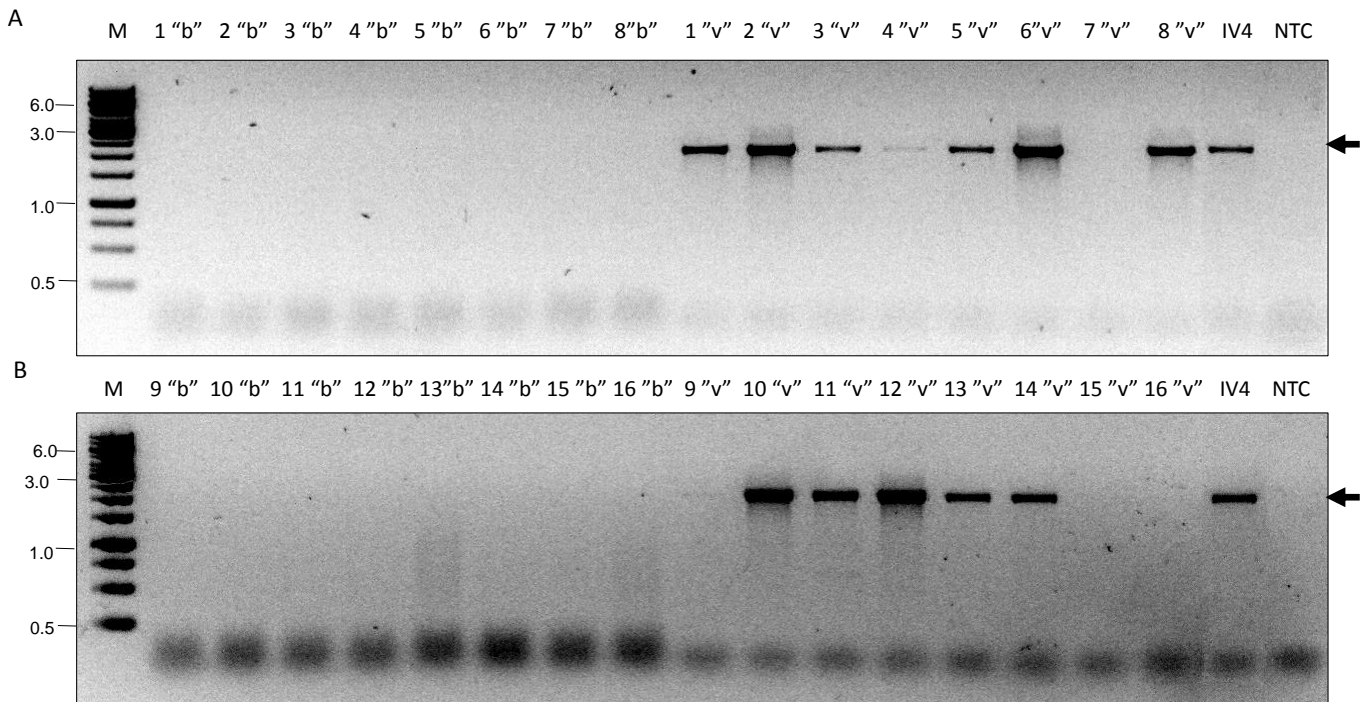

**Figure S2. VDV-2 is present in *Varroa* mites but not in honey bees.** RT-PCR run of individual bees ("b") and *Varroa* mites ("v"). A. Samples from hives 401 and 7 (1-4 and 5-8, respectively). B. Samples from hive 10 and 6 (9-10 and 11-14, respectively). IV-4, *Varroa* transcriptome sample. NTC, primers only. VDV-2 primers used were 3777F and 5879R (see Supplementary Table S1). Arrows VDV-2. Marker: GeneRuler 1 kb DNA Ladder (Thermo Scientific Inc.).

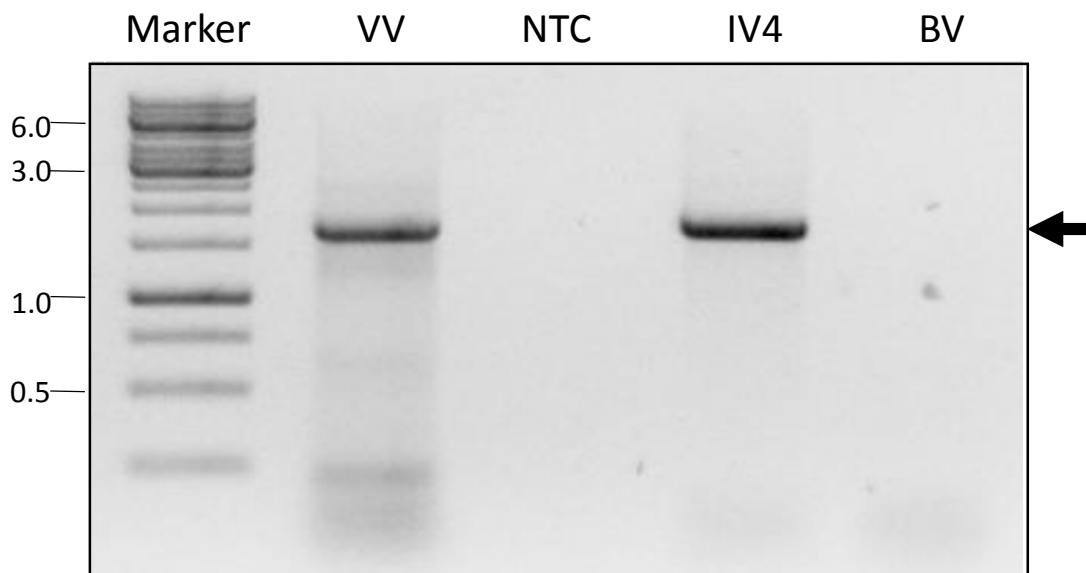

**Figure S3. VDV-3 is present in the *Varroa* virome but not in the honey bee virome.** RT-PCR run of the honey bee and *Varroa* viromes (BV and VV labels, respectively). IV-4,

*Varroa* transcriptome sample. NTC, primers only. VDV-3 primers used were 1602F and 3369R (see Supplementary Table S2). Arrows VDV-3. Marker: GeneRuler 1 kb DNA Ladder (Thermo Scientific Inc.).

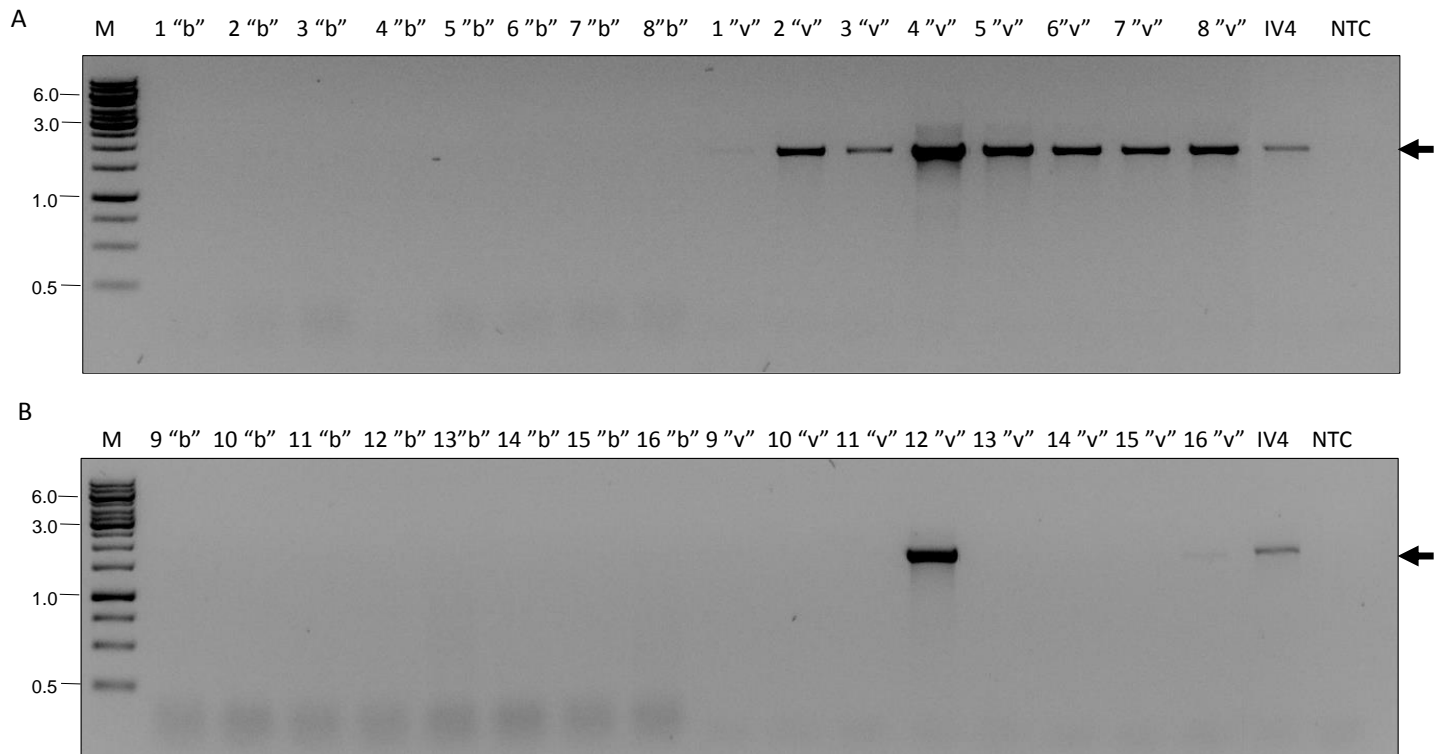

**Figure S4. VDV-3 is present in *Varroa* mites but not in honey bees.** RT-PCR run of individual bees ("b") and *Varroa* mites ("v"). A. Samples from hives 401 and 7 (1-4 and 5-8, respectively). B Samples from hive 10 and 6 (9-10 and 11-14, respectively). IV-4, *Varroa* transcriptome sample. NTC, primers only. VDV-3 primers used were 1602F and 3369R (see Supplementary Table S2). Arrows VDV-3. Marker: GeneRuler 1 kb DNA Ladder (Thermo Scientific Inc.).

A

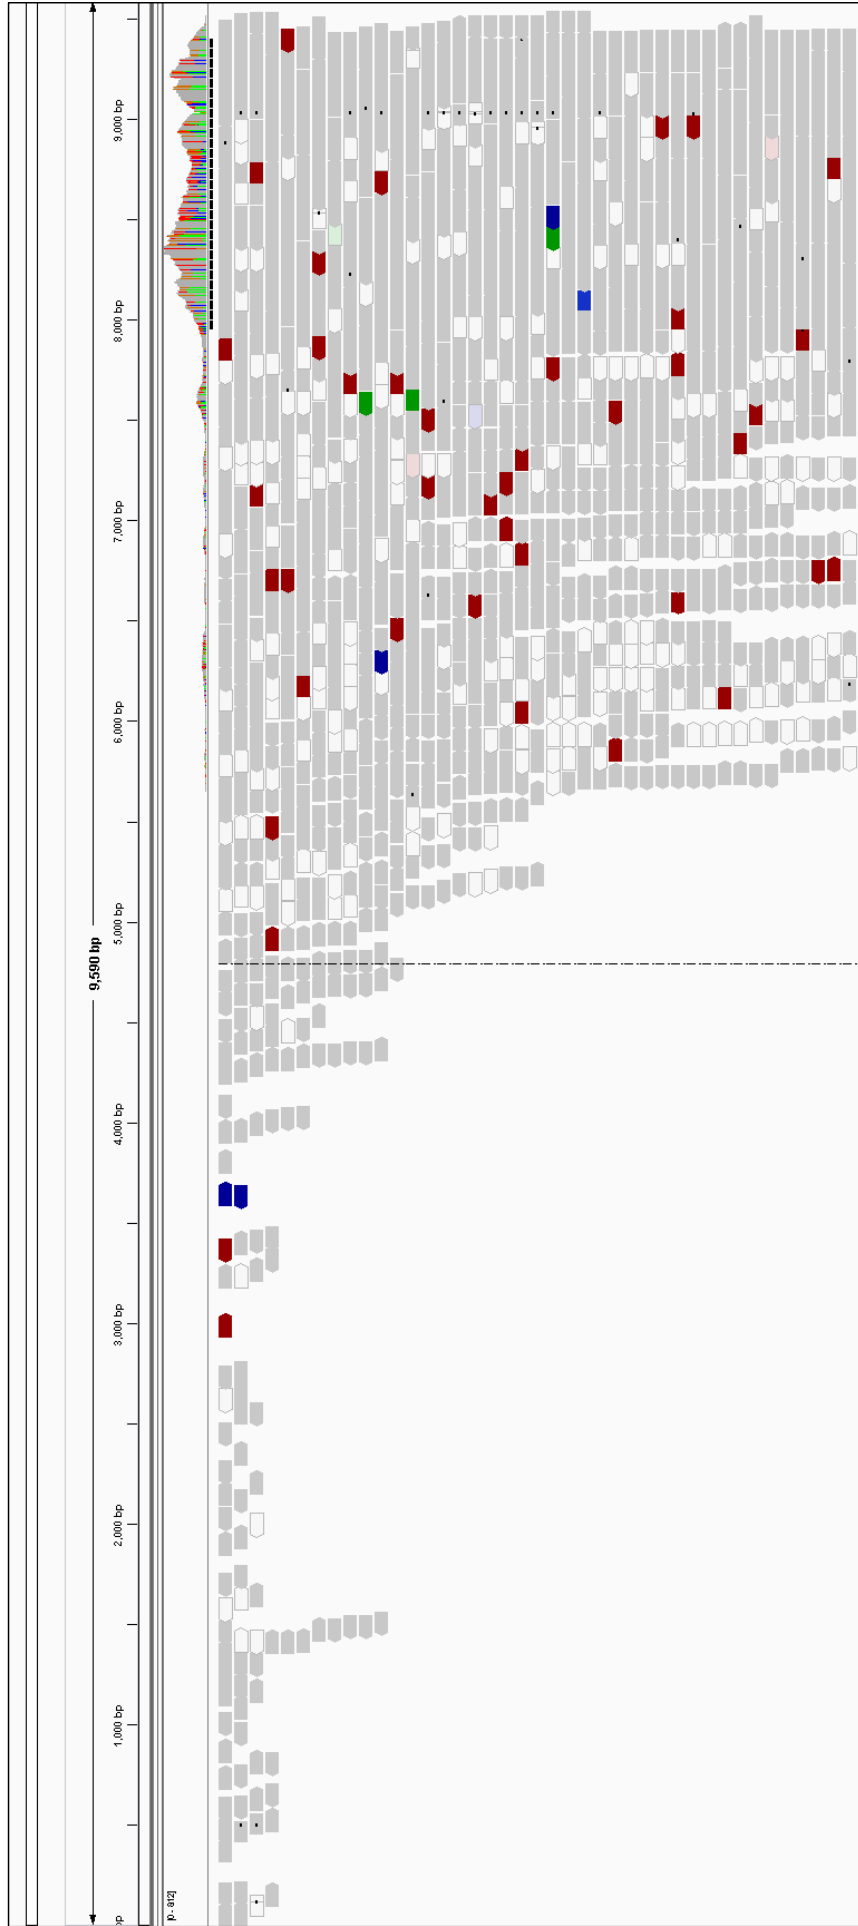

**Figure S5.** A. Mapping of transcriptome reads to the VDV-2 genome (A) and Virome (B). Colored bars indicate changes compared to the reference sequence as well as direction of the read sequence.

B

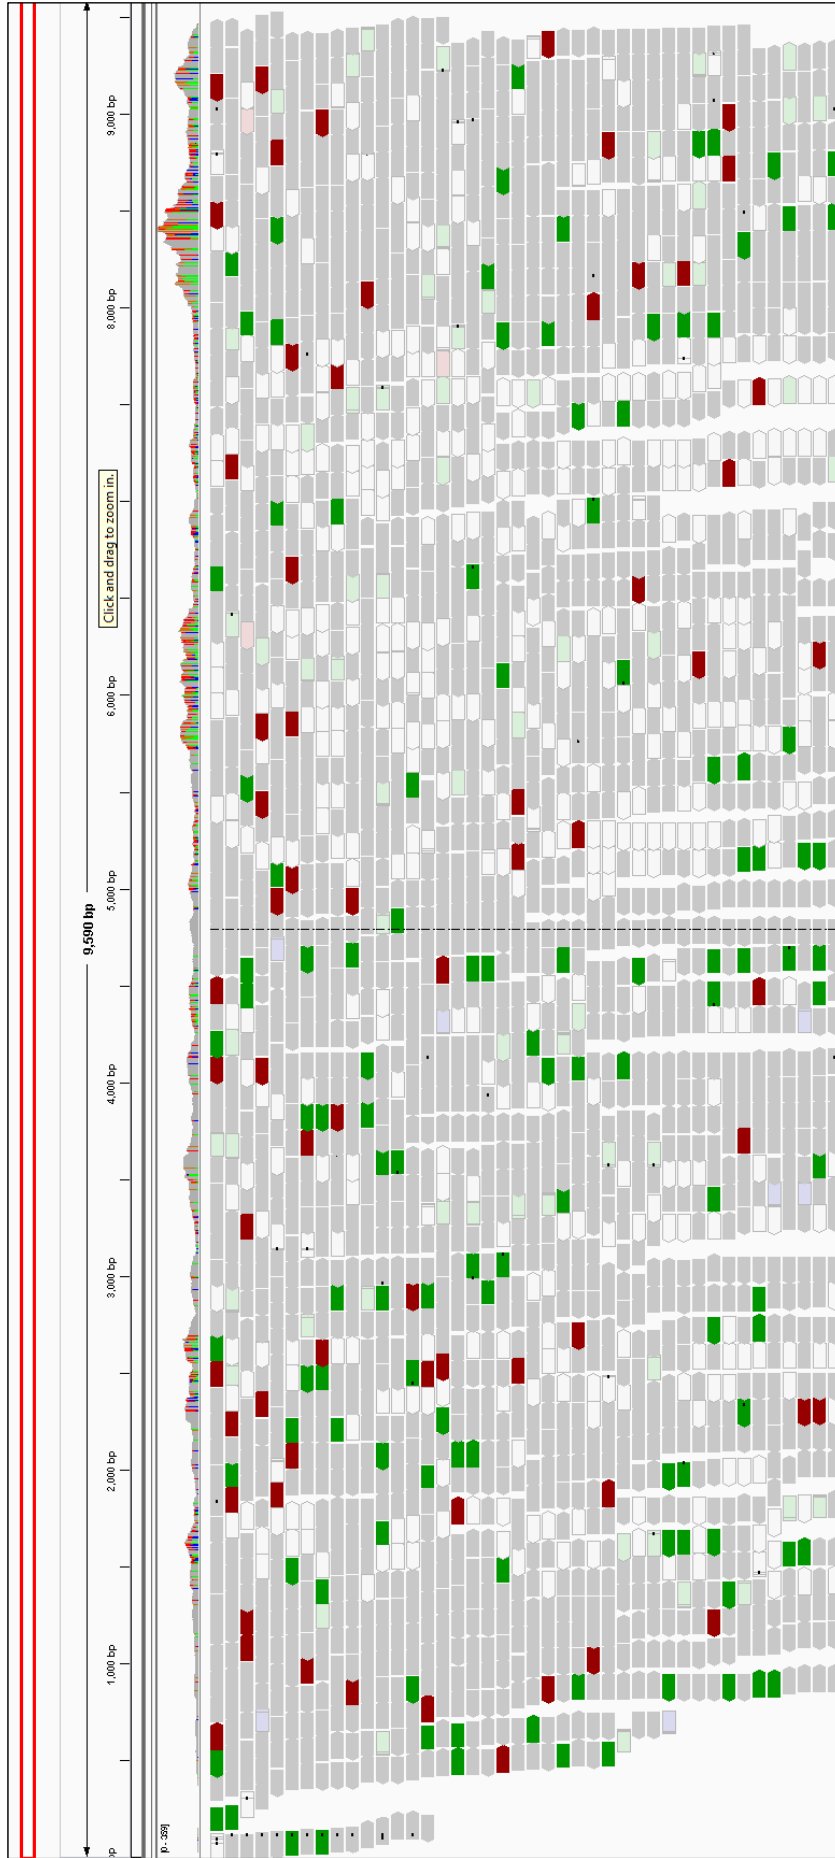

A

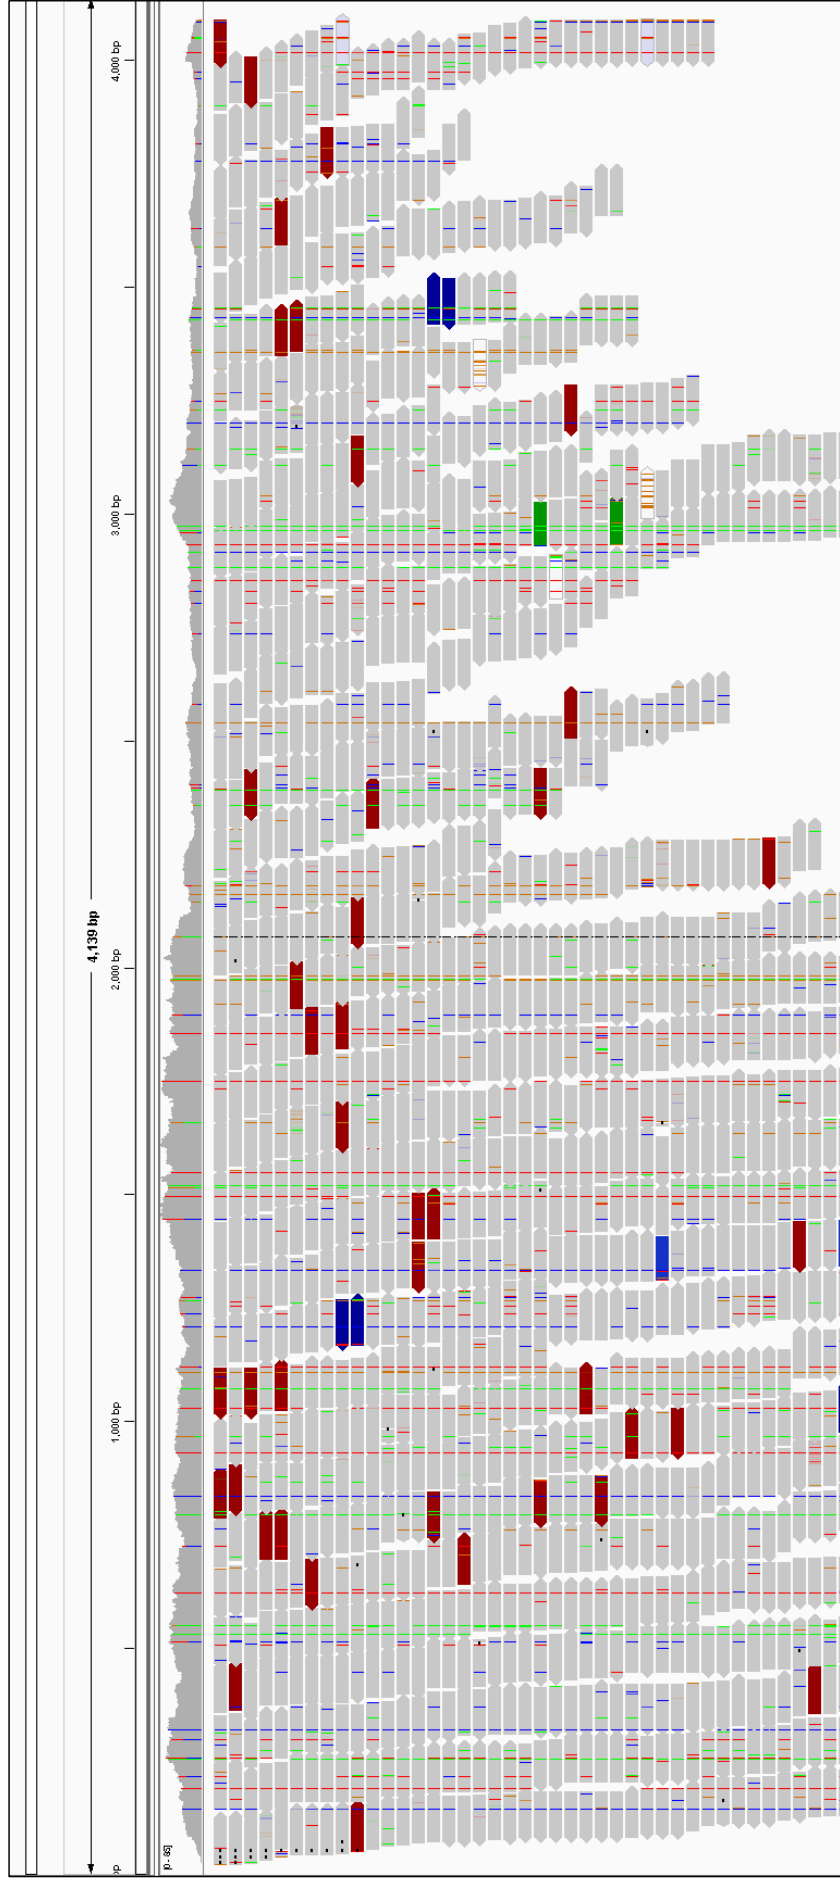

**Figure S6.** A. Mapping of transcriptome reads to the VDV-3 genome (A) and Virome (B). Colored bars indicate changes compared to the reference sequence as well as direction of the read sequence.



B

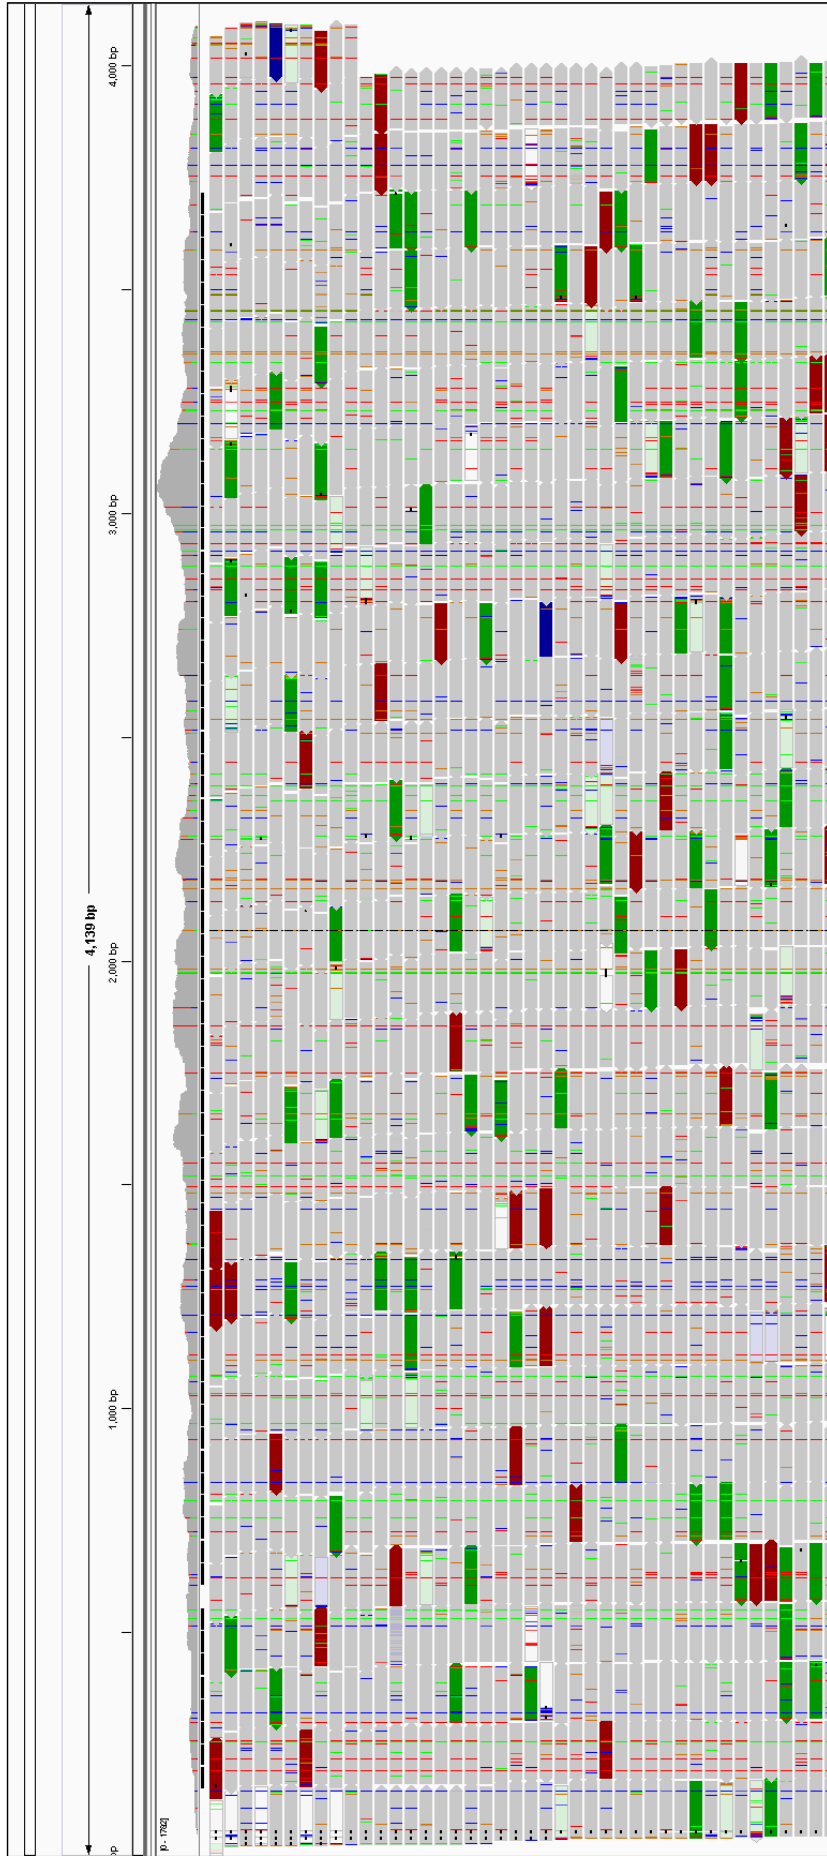

Supplement: srep37710-s1.pdf [file srep37710-s1.pdf]
